# Supplementary material for: Biomarkers of nanomaterials hazard from multi-layer data
Source: PubMed Central journal article supplement (PMC9249793; doi:10.1038/s41467-022-31609-5), 2022-07-01
Supplement: 41467_2022_31609_MOESM2_ESM.pdf [file 41467_2022_31609_MOESM2_ESM.pdf]

## Reporting Summary

Nature Portfolio wishes to improve the reproducibility of the work that we publish. This form provides structure for consistency and transparency in reporting. For further information on Nature Portfolio policies, see our [Editorial Policies](#) and the [Editorial Policy Checklist](#).

Please do not complete any field with "not applicable" or n/a. Refer to the help text for what text to use if an item is not relevant to your study. For final submission: please carefully check your responses for accuracy; you will not be able to make changes later.

### Statistics

For all statistical analyses, confirm that the following items are present in the figure legend, table legend, main text, or Methods section.

n/a Confirmed

- The exact sample size ( $n$ ) for each experimental group/condition, given as a discrete number and unit of measurement
- A statement on whether measurements were taken from distinct samples or whether the same sample was measured repeatedly
- The statistical test(s) used AND whether they are one- or two-sided  
*Only common tests should be described solely by name; describe more complex techniques in the Methods section.*
- A description of all covariates tested
- A description of any assumptions or corrections, such as tests of normality and adjustment for multiple comparisons
- A full description of the statistical parameters including central tendency (e.g. means) or other basic estimates (e.g. regression coefficient) AND variation (e.g. standard deviation) or associated estimates of uncertainty (e.g. confidence intervals)
- For null hypothesis testing, the test statistic (e.g.  $F$ ,  $t$ ,  $r$ ) with confidence intervals, effect sizes, degrees of freedom and  $P$  value noted  
*Give  $P$  values as exact values whenever suitable.*
- For Bayesian analysis, information on the choice of priors and Markov chain Monte Carlo settings
- For hierarchical and complex designs, identification of the appropriate level for tests and full reporting of outcomes
- Estimates of effect sizes (e.g. Cohen's  $d$ , Pearson's  $r$ ), indicating how they were calculated

*Our web collection on [statistics for biologists](#) contains articles on many of the points above.*

### Software and code

Policy information about [availability of computer code](#)

Data collection

Data analysis

For manuscripts utilizing custom algorithms or software that are central to the research but not yet described in published literature, software must be made available to editors and reviewers. We strongly encourage code deposition in a community repository (e.g. GitHub). See the Nature Portfolio [guidelines for submitting code & software](#) for further information.

### Data

Policy information about [availability of data](#)

All manuscripts must include a [data availability statement](#). This statement should provide the following information, where applicable:

- Accession codes, unique identifiers, or web links for publicly available datasets
- A description of any restrictions on data availability
- For clinical datasets or third party data, please ensure that the statement adheres to our [policy](#)

The processed mRNA, miRNA, proteomics, protein corona, physico chemical properties and BAL cell counts used in this paper have been deposited in the online Zenodo repository under the accession number 10.5281/zenodo.4247173.

## Human research participants

Policy information about [studies involving human research participants and Sex and Gender in Research](#).

|                             |                                             |
|-----------------------------|---------------------------------------------|
| Reporting on sex and gender | <input type="text" value="does not apply"/> |
| Population characteristics  | <input type="text" value="does not apply"/> |
| Recruitment                 | <input type="text" value="does not apply"/> |
| Ethics oversight            | <input type="text" value="does not apply"/> |

Note that full information on the approval of the study protocol must also be provided in the manuscript.

## Field-specific reporting

Please select the one below that is the best fit for your research. If you are not sure, read the appropriate sections before making your selection.

- Life sciences       Behavioural & social sciences       Ecological, evolutionary & environmental sciences

## Life sciences study design

All studies must disclose on these points even when the disclosure is negative.

|                 |                                                                                                                                                                                                                                                                              |
|-----------------|------------------------------------------------------------------------------------------------------------------------------------------------------------------------------------------------------------------------------------------------------------------------------|
| Sample size     | <input type="text" value="This study consists of 31 nanomaterials measured on 9 different data layers. No statistical methods were utilized to calculate sample size. The evaluation was qualitative and based on the selection of nanomaterials of industrial relevance."/> |
| Data exclusions | <input type="text" value="No data exclusion was performed"/>                                                                                                                                                                                                                 |
| Replication     | <input type="text" value="Original omic data were performed in triplicates. The modelling has been carried out by cross-validation strategy. All replication attempts were successful."/>                                                                                    |
| Randomization   | <input type="text" value="All the omics experiments analysed in this study were generated by following the randomisation scheme described in (Kinaret et al. 2021)."/>                                                                                                       |
| Blinding        | <input type="text" value="Blinding techniques were not needed as we relied on robust analytical strategies based on robust statistical procedures (eg. permutation, cross validation, etc)."/>                                                                               |

## Reporting for specific materials, systems and methods

We require information from authors about some types of materials, experimental systems and methods used in many studies. Here, indicate whether each material, system or method listed is relevant to your study. If you are not sure if a list item applies to your research, read the appropriate section before selecting a response.

### Materials & experimental systems

|     |                                                           |
|-----|-----------------------------------------------------------|
| n/a | Involvement in the study                                  |
|     | <input type="checkbox"/> Antibodies                       |
|     | <input checked="" type="checkbox"/> Eukaryotic cell lines |
|     | <input type="checkbox"/> Palaeontology and archaeology    |
|     | <input type="checkbox"/> Animals and other organisms      |
|     | <input type="checkbox"/> Clinical data                    |
|     | <input type="checkbox"/> Dual use research of concern     |

### Methods

|     |                                                 |
|-----|-------------------------------------------------|
| n/a | Involvement in the study                        |
|     | <input type="checkbox"/> ChIP-seq               |
|     | <input type="checkbox"/> Flow cytometry         |
|     | <input type="checkbox"/> MRI-based neuroimaging |

## Eukaryotic cell lines

Policy information about [cell lines and Sex and Gender in Research](#)

|                     |                                                                                                                                                 |
|---------------------|-------------------------------------------------------------------------------------------------------------------------------------------------|
| Cell line source(s) | <input type="text" value="The human acute monocytic leukemia cell line THP-1 was purchased from the American Type Culture Collection (ATCC)."/> |
|---------------------|-------------------------------------------------------------------------------------------------------------------------------------------------|

## Authentication

The cells were used for up to 30 passages and were tested regularly using MycoAlert® mycoplasma detection kit (Lonza).  
THP-1 cells were not authenticated by us but ATCC has performed cell line authentication by using STR analysis/profiling.

## Mycoplasma contamination

All cell lines were tested negative for mycoplasma

Commonly misidentified lines  
(See [ICLAC](#) register)

None
